# Supplementary material for: Inorganic lead-free antimony-based perovskite-inspired solar cells with a carbon electrode and green anti-solvent regulation
Source: Royal Society of Chemistry journal article supplement (doi:10.1039/d1tc03885k), 2021-01-01
Supplement: d1tc03885k1.pdf [file d1tc03885k1.pdf]

## Support Information

### **Inorganic Lead-Free Antimony-based Perovskite-inspired Solar Cells with Carbon Electrode and Green Anti-solvent Regulation**

Jun Zhou<sup>a</sup>, Fei Zhao<sup>a</sup>, Junhao Shen<sup>a</sup>, Yang Zhou<sup>a</sup>, Yuyao Wu<sup>a</sup>, Yixin Guo<sup>\*a</sup>, Jinchun Jiang<sup>\*a</sup> and Junhao Chu<sup>a</sup>

<sup>a</sup>School of Physics and Electronic Science, East China Normal University, Shanghai 200241, China

Dr. Yixin Guo\*, Prof. Jinchun Jiang\*

School of Physics and Electronic Science, East China Normal University, Shanghai 200241, China

\*E-mail: yxguo@ee.ecnu.edu.cn; jcjiang@ee.ecnu.edu.cn

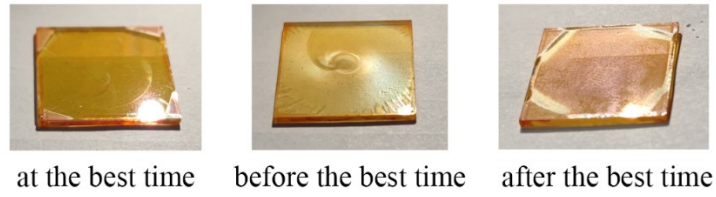

**Fig. S1** Photographs of the  $\text{Cs}_3\text{Sb}_2\text{Cl}_x\text{I}_{9-x}$  films prepared by the anti-solvent at the different dropping time.

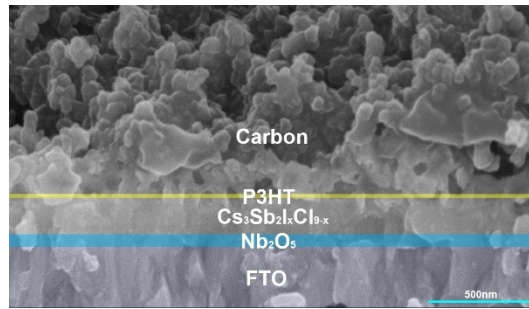

**Fig. S2** Cross-sectional SEM image of Sb-based perovskite-like solar cell.

**Table S1.** Performance parameters of Sb-based perovskite-like solar cells using different solvents.

| DMF: DMSO | $V_{oc}$ (V)      | $J_{sc}$ (mA/cm <sup>2</sup> ) | FF (%)              | PCE (%)           |
|-----------|-------------------|--------------------------------|---------------------|-------------------|
| 1:0       | 0.84(0.84 ± 0.02) | 4.47(4.20 ± 0.27)              | 55.20(54.45 ± 1.33) | 2.07(1.91 ± 0.13) |
| 0:1       | 0.79(0.74 ± 0.08) | 4.00(3.27 ± 0.51)              | 53.81(49.75 ± 5.94) | 1.69(1.23 ± 0.34) |

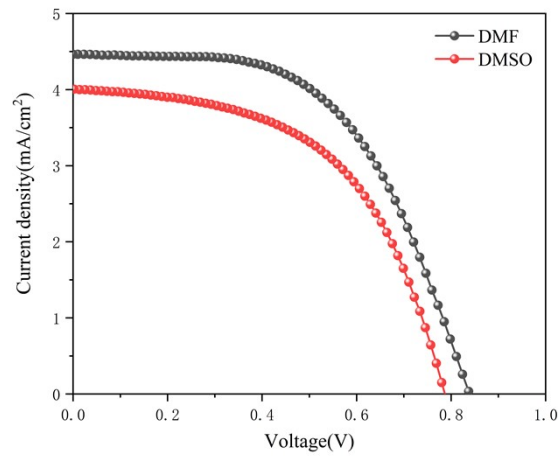

**Fig. S3** J-V curves of Sb-based perovskite-like solar cells fabricated by different solvents

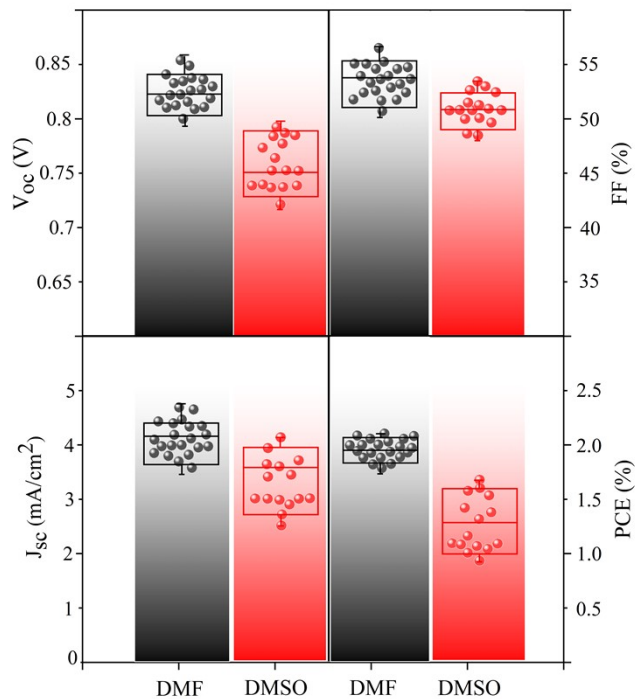

**Fig. S4** Statistical photovoltaic parameters for Sb-based perovskite-like solar cells with different solvents.

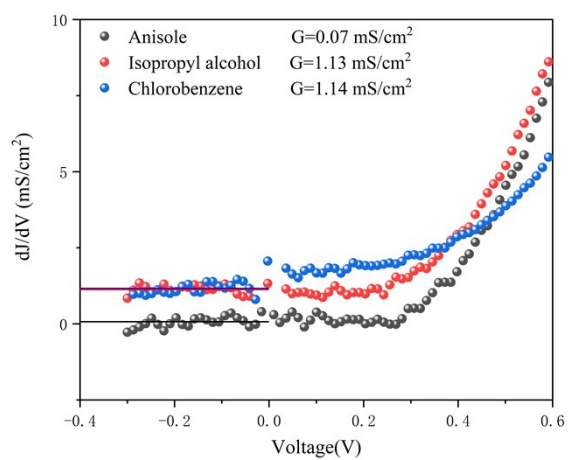

**Fig. S5** Plot of  $dJ/dV$  vs V

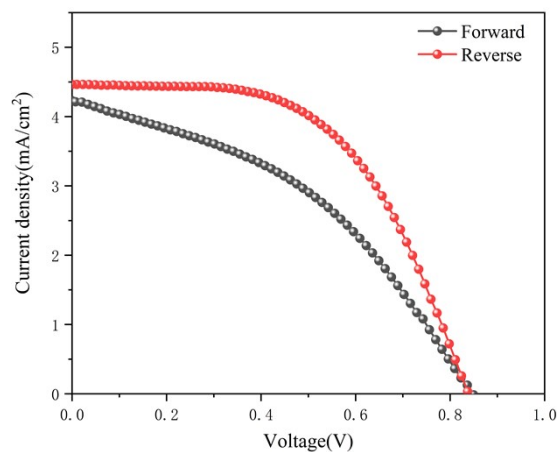

**Fig. S6** J-V curves of devices prepared by anisole from forward and reverse scanning direction

**Table S2.** Performance parameters from the calibrated Si solar cells

| Instrument model | Efficiency (%)   | $V_{oc}$ (V)        | $J_{sc}$ (mA)     |
|------------------|------------------|---------------------|-------------------|
| Sol3A            | $14.67 \pm 0.04$ | $0.5810 \pm 0.0004$ | $135.00 \pm 0.13$ |

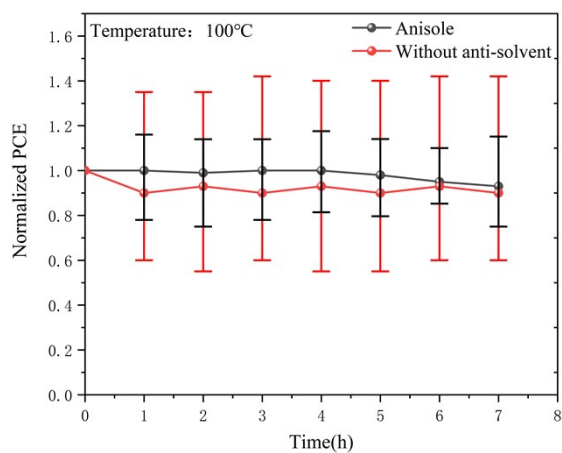

**Fig. S7** Thermal stability
